# Supplementary material for: Synergistic effects of Pd single atoms and nanoclusters boosting SnO2 gas sensing performance
Source: Royal Society of Chemistry journal article supplement (doi:10.1039/d4tc04761c), 2025-01-01
Supplement: d4tc04761c1.pdf [file d4tc04761c1.pdf]

## Supporting Information

### Synergistic Effects of Pd Single Atoms and Nanoclusters Boosting SnO<sub>2</sub> Gas Sensing Performance

*Yaprak Ozbakir*<sup>a, b</sup>, *Yong Xia*<sup>c, d</sup>, *Aifei Pan*<sup>d</sup>, *Jiyun Hong*<sup>e</sup>, *Jorge E. Perez-Aguilar*<sup>e</sup>, *Simon R. Bare*<sup>e</sup>, *Francesca Rossi*<sup>f</sup>, *Rohan Dhall*<sup>g</sup>, *Afnan Ali Alghannam*<sup>a</sup>, *Nishit Goel*<sup>h</sup>, *Stephen Bart*<sup>h</sup>,  
*Carlo Carraro*<sup>a, b</sup>, and *Roya Maboudian*<sup>a, b, \*</sup>

<sup>a</sup> Department of Chemical and Biomolecular Engineering, University of California, Berkeley, CA 94720, United States

<sup>b</sup> Berkeley Sensor & Actuator Center, Berkeley, CA 94720, United States

<sup>c</sup> School of Instrument Science and Technology, Xi'an Jiaotong University, Xi'an 710049, China

<sup>d</sup> State Key Laboratory for Manufacturing Systems Engineering, and International Joint Laboratory for Micro/Nano Manufacturing and Measurement Technologies, Xi'an Jiaotong University, Xi'an, 710049, China

<sup>d</sup> State Key Laboratory for Manufacturing Systems Engineering, and International Joint Laboratory for Micro/Nano Manufacturing and Measurement Technologies, Xi'an Jiaotong University, Xi'an, 710049, China

<sup>e</sup> SSRL, SLAC National Accelerator Laboratory, Menlo Park, California 94025, U.S.A.

<sup>f</sup> IMEM-CNR Institute, 43124 Parma, Italy

<sup>g</sup> National Center for Electron Microscopy (NCEM), Lawrence Berkeley National Laboratory, Berkeley, CA 94720, U.S.A.

<sup>h</sup> TDK InvenSense Inc., San Jose, California 95110, U.S.A.

Table of Contents for

**Supporting Figures and Tables** ..... 1

\* Corresponding author email: [maboudia@berkeley.edu](mailto:maboudia@berkeley.edu)

|                                                                                                                                                                                                                                                                                                                                                                                                                                           |    |
|-------------------------------------------------------------------------------------------------------------------------------------------------------------------------------------------------------------------------------------------------------------------------------------------------------------------------------------------------------------------------------------------------------------------------------------------|----|
| Figure S1. FTIR spectra of palladium acetate, ADC Pd/SnO <sub>2</sub> , and pure SnO <sub>2</sub> .....                                                                                                                                                                                                                                                                                                                                   | 5  |
| Scheme S1. Preparation of Pd nanoparticles on SnO <sub>2</sub> .....                                                                                                                                                                                                                                                                                                                                                                      | 5  |
| Preparation of Pd nanoparticles on SnO <sub>2</sub> .....                                                                                                                                                                                                                                                                                                                                                                                 | 5  |
| Figure S2. Chemiresistive gas sensor fabrication .....                                                                                                                                                                                                                                                                                                                                                                                    | 6  |
| Figure S3. Gas sensing test apparatus. ....                                                                                                                                                                                                                                                                                                                                                                                               | 7  |
| Figure S4. Definition of sensor response, response and recovery times .....                                                                                                                                                                                                                                                                                                                                                               | 8  |
| Figure S5. Nitrogen adsorption-desorption isotherm of SnO <sub>2</sub> support at 77 K .....                                                                                                                                                                                                                                                                                                                                              | 8  |
| Figure S6. Representative FESEM images of a) SnO <sub>2</sub> , b) Pd NPs/SnO <sub>2</sub> and ADC Pd /SnO <sub>2</sub> , respectively. Scale bars, 100 nm, 200 nm, respectively.....                                                                                                                                                                                                                                                     | 9  |
| Figure S7. STEM image of Pd NPs/SnO <sub>2</sub> and its corresponding EDS elemental mapping images of Pd, O and Sn. Scale bars, 100 nm. b) HRTEM image of Pd NPs/SnO <sub>2</sub> . Scale bar, 5 nm. c) EDS analysis showing presence of Pd element in the Pd NPs/SnO <sub>2</sub> .....                                                                                                                                                 | 9  |
| Figure S8. Structural and morphological characterization of ADC Pd/SnO <sub>2</sub> .....                                                                                                                                                                                                                                                                                                                                                 | 10 |
| Figure S9. Comparison of actual Pd loading in ADC Pd/SnO <sub>2</sub> quantified via ICP-OES with its nominal loading.....                                                                                                                                                                                                                                                                                                                | 10 |
| Table S1. X-ray photoelectron spectroscopy analyses data .....                                                                                                                                                                                                                                                                                                                                                                            | 10 |
| Scheme S2. A simple model assuming one atom thick Pd covers SnO <sub>2</sub> support .....                                                                                                                                                                                                                                                                                                                                                | 11 |
| Figure S10. a) XPS spectra of the as prepared ADC Pd/SnO <sub>2</sub> . Oxygen core level spectra of SnO <sub>2</sub> and ADC Pd/SnO <sub>2</sub> : O 1s peaks of SnO <sub>2</sub> , and ADC Pd/SnO <sub>2</sub> were deconvoluted and assigned to two major subpeaks. The first peak (O <sub>1</sub> ) at 531.1 eV is the oxygen vacancies (O <sub>v</sub> ), the second peak at 532.8 eV is the surface OH group (O <sub>e</sub> )..... | 11 |
| Figure S11. XPS characterization of Pd NP/SnO <sub>2</sub> .....                                                                                                                                                                                                                                                                                                                                                                          | 12 |
| Figure S12. a) UV-vis diffuse reflectance spectra (DRS) of pure SnO <sub>2</sub> and ADC Pd/SnO <sub>2</sub> b) The respective Kubelka Munk function for estimating the band gap energy c) Band structure diagram for SnO <sub>2</sub> and ADC Pd/SnO <sub>2</sub> .....                                                                                                                                                                  | 12 |
| Table S2. Types and number of scattering paths expected for different structural models. The ADC Model 3 is consistent with the EXAFS modeling of ADC Pd/SnO <sub>2</sub> sample .....                                                                                                                                                                                                                                                    | 13 |

Figure S13. EXAFS modeling of the Pd NPs/SnO<sub>2</sub> using coordination numbers and bond distances of bulk PdO. The detail of the fit is summarized in Table S3. Fitting was performed on the k-range of 3.0 – 13.5 Å<sup>-1</sup> and R-range of 1.0 – 3.9 Å. S<sub>0</sub><sup>2</sup> was set to 0.78±0.04.....14

Table S3. Types and number of scattering paths for EXAFS modeling of Pd NP. ....14

Figure S14. Comparison of Pd-Pd vs. Pd-Sn scattering paths at 3.05 and 3.45 Å in the k<sup>2</sup>-weighted (A) R-space and (B) k-space .....14

Figure S15. Comparison of the EXAFS modeling of ADC Pd/SnO<sub>2</sub> using different combinations of scattering paths. The data and fits are shown in the k<sup>2</sup>-weighted (A) k-space and (B) R-space in magnitude (solid lines) and imaginary (dotted lines). Fit 1 includes only Pd-Pd paths while fit 2 includes only Pd-Sn paths. Fit 3 includes both Pd-Pd and Pd-Sn. All fits also include Pd-O path. The details of the fits are summarized in Table S4. Fitting was performed on the k-range of 3.0 – 13.5 Å<sup>-1</sup> and R-range of 1.0 – 3.7 Å.....15

Table S4. Fitting parameters for the EXAFS of ADC Pd/SnO<sub>2</sub>.....16

Figure S16. Structural models considered for the ADC Pd/SnO<sub>2</sub>. (a) A layer of PdO sheet. (b) Model 1 has a Pd<sub>2</sub>O<sub>6</sub> unit anchored vertically on O atoms of SnO<sub>2</sub>. (c) Model 2 has a Pd<sub>2</sub>O<sub>6</sub> unit anchored vertically on Sn atoms of SnO<sub>2</sub>. (d) Model 3 has a Pd<sub>2</sub>O<sub>6</sub> lying flat on the surface of SnO<sub>2</sub>. (Red: O, Grey: Pd, Blue: Sn) .....17

Table S5. Types and number of scattering paths expected for different structural models. The Model 3 is consistent with the EXAFS modeling of ADC Pd/SnO<sub>2</sub> sample. ....18

Figure S17. Estimation of limit of detection of the ADC Pd/SnO<sub>2</sub> sensor .....19

Figure S18. Dynamic response and recovery curves of the ADC Pd/SnO<sub>2</sub> sensor upon exposure to 100 ppm CO at various temperatures between 25-120 °C: a-d) Sensor resistance concentration plots of ADC Pd/SnO<sub>2</sub> to 100 ppm CO at 25-120 °C. e) Sensor response time plot of ADC Pd/SnO<sub>2</sub> to 100 ppm CO at 25-270 °C. f) Sensor recovery time plot of ADC Pd/SnO<sub>2</sub> to 100 ppm CO at 25-270 °C.....20

Figure S19. a) Sensor resistance plot of Pd NP/SnO<sub>2</sub> to 100 ppm pulses of CO at 60 °C. b) Extended sensor resistance plot of Pd NP/SnO<sub>2</sub> to 100 ppm pulses of CO at 60 °C during ~ 154-164 min. c) Sensor response to 100 ppm CO at 45-270 °C. d) Sensor response time plot of Pd NP/SnO<sub>2</sub> to 100 ppm CO at 45-270 °C. e) Sensor recovery time plot of Pd NP/SnO<sub>2</sub> to 100 ppm CO at 45-270 °C .....20

Figure S20. a) Sensor resistance plot of pure SnO<sub>2</sub> to 100 ppm pulses of CO at 60 °C. b) Sensor response to 100 ppm CO at 45-270 °C. c) Sensor response time plot of pure SnO<sub>2</sub> to 100 ppm CO at 45-270 °C. d) Sensor recovery time plot of pure SnO<sub>2</sub> to 100 ppm CO at 45-270 °C.....21

Figure S21. In situ IR spectroscopy of CO interaction with pure SnO<sub>2</sub> in air at 60 °C .....21

Figure S22. Illustration of the different CO adsorption sites on ADC Pd/SnO<sub>2</sub>. Pd, Sn, C, and O atoms are displayed as orange, dark gray, light gray and red spheres, respectively .....21

Figure S23. In situ IR spectroscopy of CO interaction with ADC Pd/SnO<sub>2</sub> in air at 60-270 °C. ....23

Figure S24. Illustration of the different CO adsorption sites on Pd NP/SnO<sub>2</sub>. Pd, Sn, C, and O atoms are displayed as orange, dark gray, light gray and red spheres, respectively .....24

Figure S25. In situ IR spectroscopy of CO interaction with Pd NP/SnO<sub>2</sub> in air at 60-270 °C.....25

Figure S26. Log (S<sub>g</sub>-1) vs. log C<sub>g</sub> curve of ADC Pd/SnO<sub>2</sub> sensor response to CO at 60 °C, where S<sub>g</sub> is the sensor response (defined previously as R<sub>a</sub>/R<sub>g</sub>), expressed by Eq. 1 in the main text and C<sub>g</sub> is the gas concentration. ....26

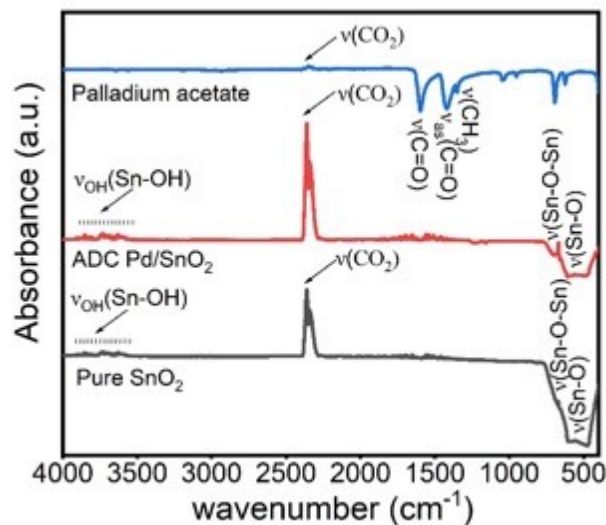

Figure S1. FTIR spectra of palladium acetate, ADC Pd/SnO<sub>2</sub>, and pure SnO<sub>2</sub>. The band at 2360 cm<sup>-1</sup> is assigned to atmospheric CO<sub>2</sub>.

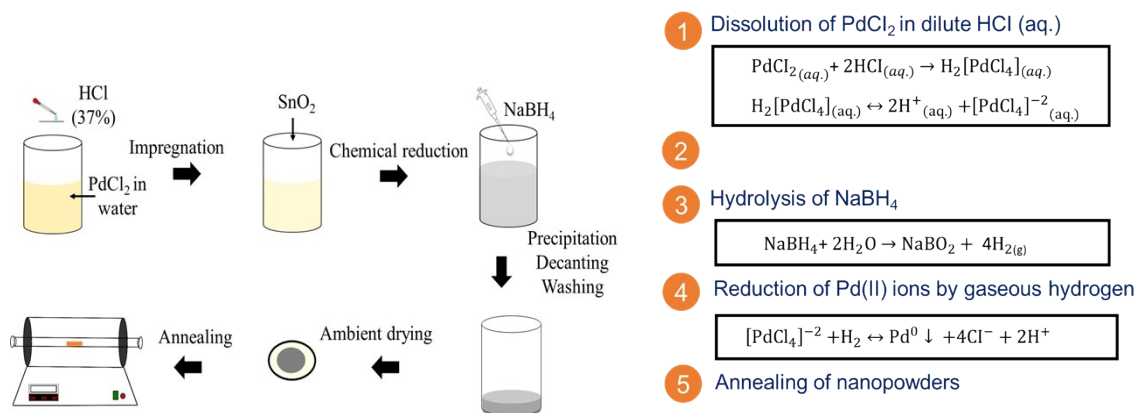

Scheme S1. Preparation of Pd nanoparticles on SnO<sub>2</sub>

### Preparation of Pd nanoparticles on SnO<sub>2</sub>

For comparison, Pd nanoparticles loaded onto SnO<sub>2</sub>, labeled as Pd NPs/SnO<sub>2</sub>, was synthesized via wet impregnation of Pd precursor onto SnO<sub>2</sub> support and chemical reduction of Pd ions, followed by an annealing step (Scheme S1). PdCl<sub>2</sub> was employed as the Pd<sup>2+</sup> precursor, and sodium borohydride (NaBH<sub>4</sub>) was used as the reducing agent to reduce the Pd metal ions into Pd metal nanoparticles. 24 mg PdCl<sub>2</sub> was dissolved in 100 ml DI water in the presence of a few drops of concentrated hydrochloric acid. and stirred until it was completely dissolved. 0.5 g of SnO<sub>2</sub> was then added in the PdCl<sub>2</sub> solution under continuous stirring at room temperature for 3 h. Following the impregnation of Pd complex onto the SnO<sub>2</sub> nanocrystals, 3 ml of 87.2 mM fresh

NaBH<sub>4</sub> solution was added into the solution under stirring for 3h to reduce the Pd metal ions. The color of the suspension changed from yellow to gray, which indicates that Pd nanoparticles precipitated on the SnO<sub>2</sub> nanocrystals. The prepared Pd NPs/SnO<sub>2</sub> catalysts were washed with DI water and ethanol several times, respectively, and the precipitate was dried at room temperature overnight. Finally, the obtained gray powder was annealed at 500 °C in atmospheric air at ambient pressure for 3h, which yielded brownish powder. The presence of Pd, Sn and O in the full spectrum scan of XPS in Figure S11 is evidenced without any impurity elements, suggesting complete removal of Cl<sup>-</sup> and the formation of Pd-O-Sn based catalyst.

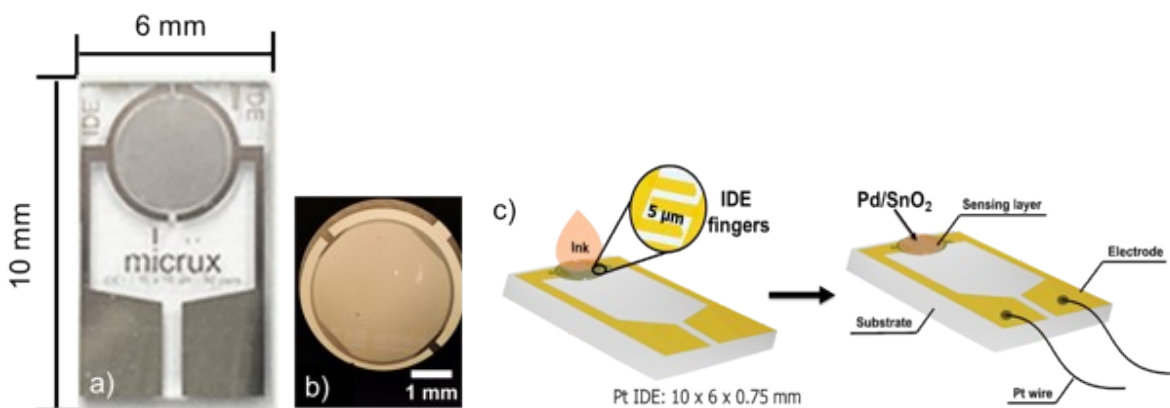

Figure S2. Chemiresistive gas sensor fabrication: a) Optical image of a Pt/Ti IDE with an active area of 3.5 mm in length, composed of 90 finger pairs of 5 μm width and spacing between each parallel electrode finger on glass substrate (10 x 6 x 0.75 mm). b) Optical image of the active area of the Pt/Ti IDE. c) Schematic of sensor fabrication following drop-casting a colloidal solution of the as-synthesized catalysts onto the pre-cleaned Pt-Ti interdigitated electrode; evaporation of the solvent; and post-deposition annealing treatment of the deposited sensing layer; and subsequently conductive wire-bonding.

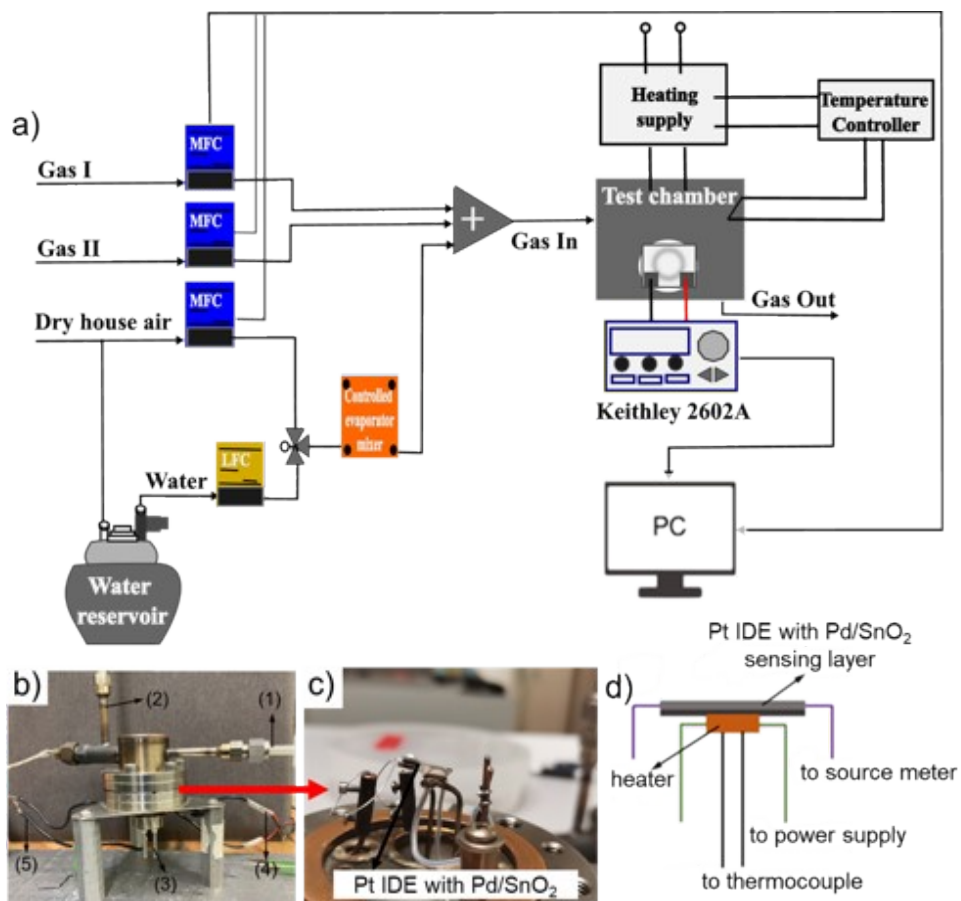

Figure S3. Gas sensing test apparatus: (a) Gas delivery system and gas sensing test setup. (b) Photo of the test chamber: (1) gas inlet; (2) gas outlet; (3) to thermocouple to measure the temperature of the heater; (4) to DC heater power supply to control the operating temperature of the sensor; (5) to source meter to measure the resistance of the sensor. (c) Internal view of the test chamber with Pd/Ti electrode installed. (d) Schematic diagram of the side-view of the sensor, heater, and electrical connections.

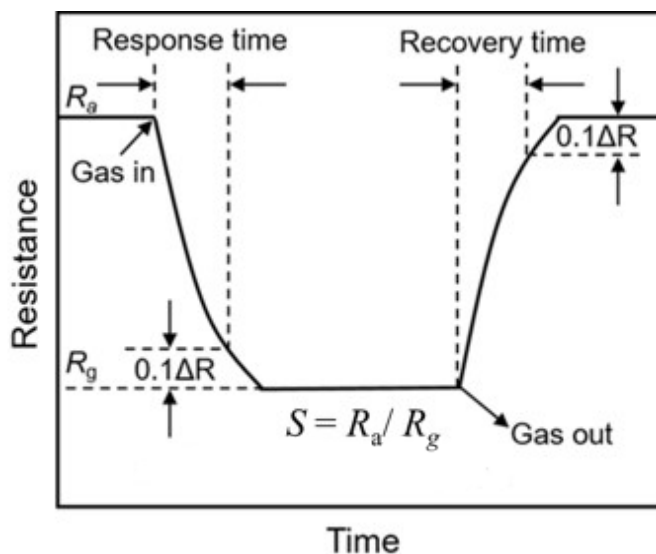

Figure S4. Definition of sensor response, response and recovery times.

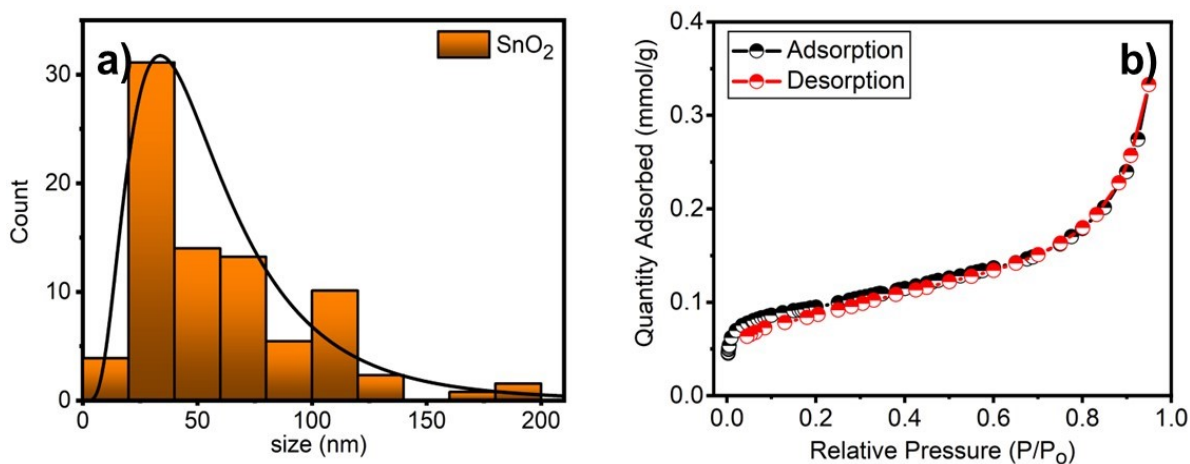

Figure S5. **a)** Particle size distribution histogram for the STEM image of SnO<sub>2</sub> support in Figure 1 in the main text. Scale bar, 50 nm. **b)** Nitrogen adsorption-desorption isotherm of SnO<sub>2</sub> support at 77 K. About 180 mg of SnO<sub>2</sub> support pre-annealed at 500 °C was degassed at 300 °C overnight before analysis. N<sub>2</sub> adsorption-desorption isotherm of annealed SnO<sub>2</sub> suggests type II isotherm, typical for non-porous materials, on which total Brunauer–Emmett–Teller (BET) surface area was calculated as 7.5 m<sup>2</sup>.g<sup>-1</sup>.



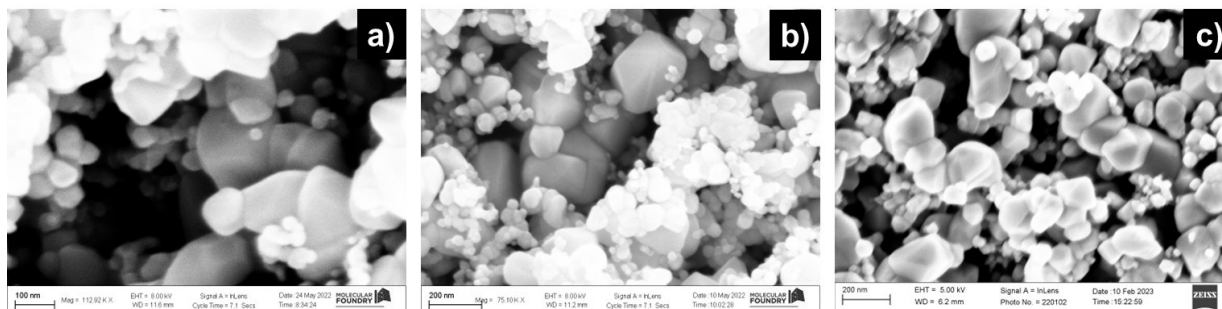

Figure S6. Representative FESEM images of a)  $\text{SnO}_2$ , b) Pd NPs/ $\text{SnO}_2$  and ADC Pd / $\text{SnO}_2$ , respectively. Scale bars, 100 nm, 200 nm, respectively.

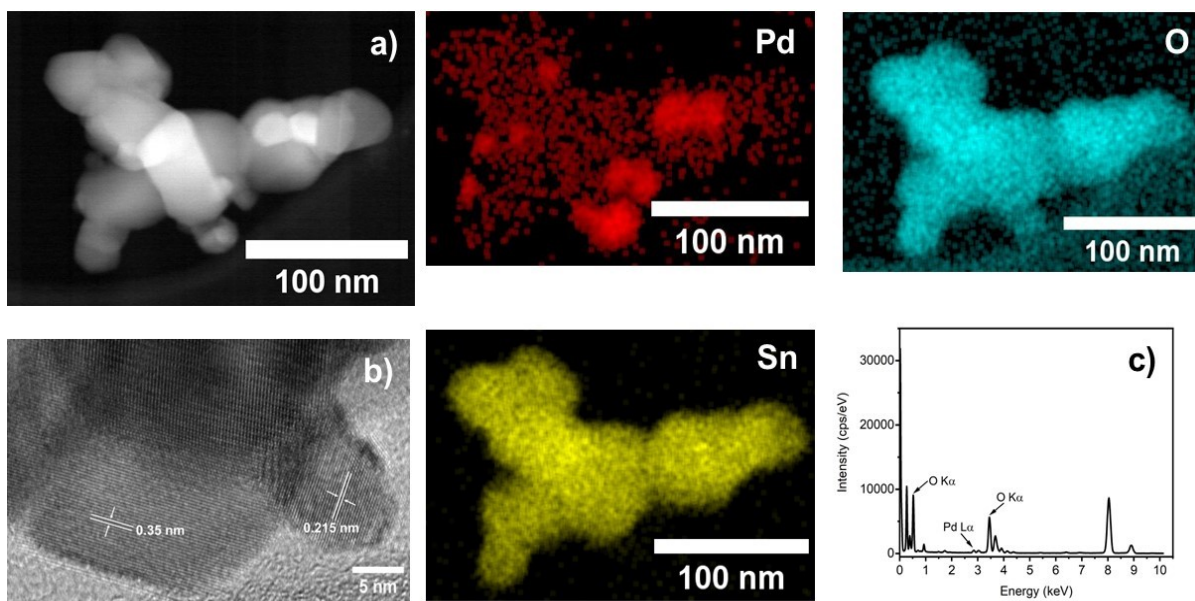

Figure S7. a) STEM image of Pd NPs/ $\text{SnO}_2$  and its corresponding EDS elemental mapping images of Pd, O and Sn. Scale bars, 100 nm. b) HRTEM image of Pd NPs/ $\text{SnO}_2$ . Scale bar, 5 nm. c) EDS analysis showing presence of Pd element in the Pd NPs/ $\text{SnO}_2$ .

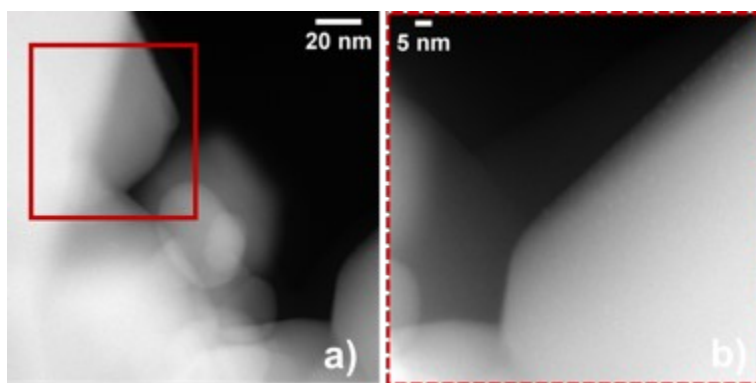

Figure S8. Structural and morphological characterization of ADC Pd/SnO<sub>2</sub>: a-b) High magnification HAADF-STEM images of ADC Pd/SnO<sub>2</sub>. Scale bars, 20 nm and 5nm, respectively.

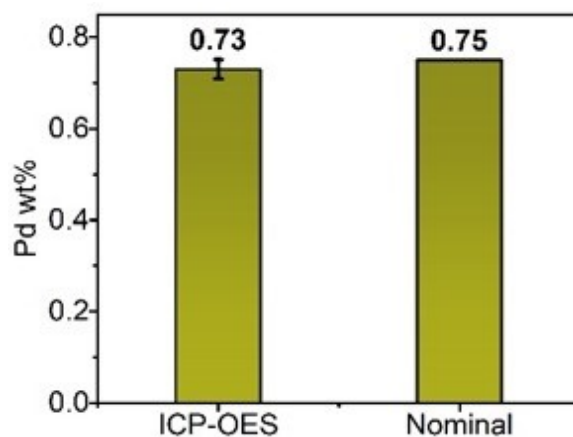

Figure S9. Comparison of actual Pd loading in ADC Pd/SnO<sub>2</sub> quantified via ICP-OES with its nominal loading

Table S1. X-ray photoelectron spectroscopy analyses data

| Line<br>(sensitivity factor) | Measured Signal<br>(x 10 <sup>3</sup> ) | Calculated Intensity<br>(x 10 <sup>3</sup> ) |
|------------------------------|-----------------------------------------|----------------------------------------------|
| O 1s (0.711)                 | 173                                     | 243                                          |
| Sn 3d <sub>5/2</sub> (4.41)  | 507                                     | 115                                          |
| Pd 3d (5.00)                 | 90                                      | 18                                           |

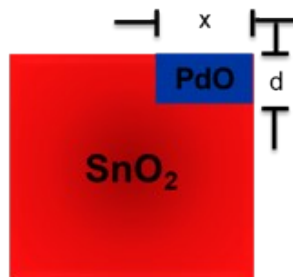

Scheme S2. A simple model assuming one atom thick Pd covers SnO<sub>2</sub> support.  $x$  represents the fractional coverage of one-atom thick Pd,  $d$  donates 0.3 nm, and  $\lambda$  is Sn photoelectron m.f.p. in Pd = 1.0 nm

The Pd atom number density on SnO<sub>2</sub> was estimated to be:

$$I_{Sn} = I_0[1 - x + xe^{-d/\lambda}] \quad (S1)$$

$$I_{Pd} = I_0x(1 - e^{-d/\lambda}) \quad (S2)$$

$$\Rightarrow x \approx 0.53$$

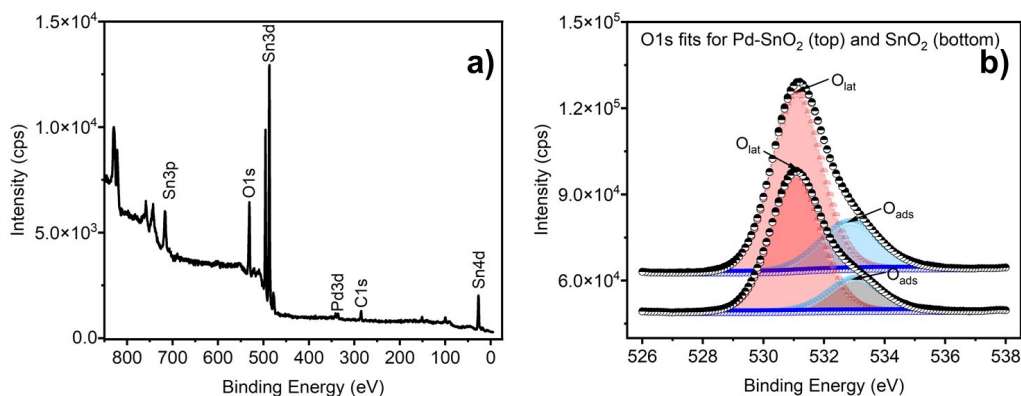

Figure S10. XPS spectra of the as prepared ADC Pd/SnO<sub>2</sub>. a) ADC Pd/SnO<sub>2</sub> wide scan. b) Oxygen core level spectra of SnO<sub>2</sub> and ADC Pd/SnO<sub>2</sub>: O 1s peaks of SnO<sub>2</sub>, and ADC Pd/SnO<sub>2</sub> were deconvoluted and assigned to two major subpeaks. The first peak (O1) at 531.1 eV is attributed to the lattice oxygen vacancies (O<sub>latt</sub>), the second peak at 532.8 eV to the surface OH group (O<sub>ads</sub>).

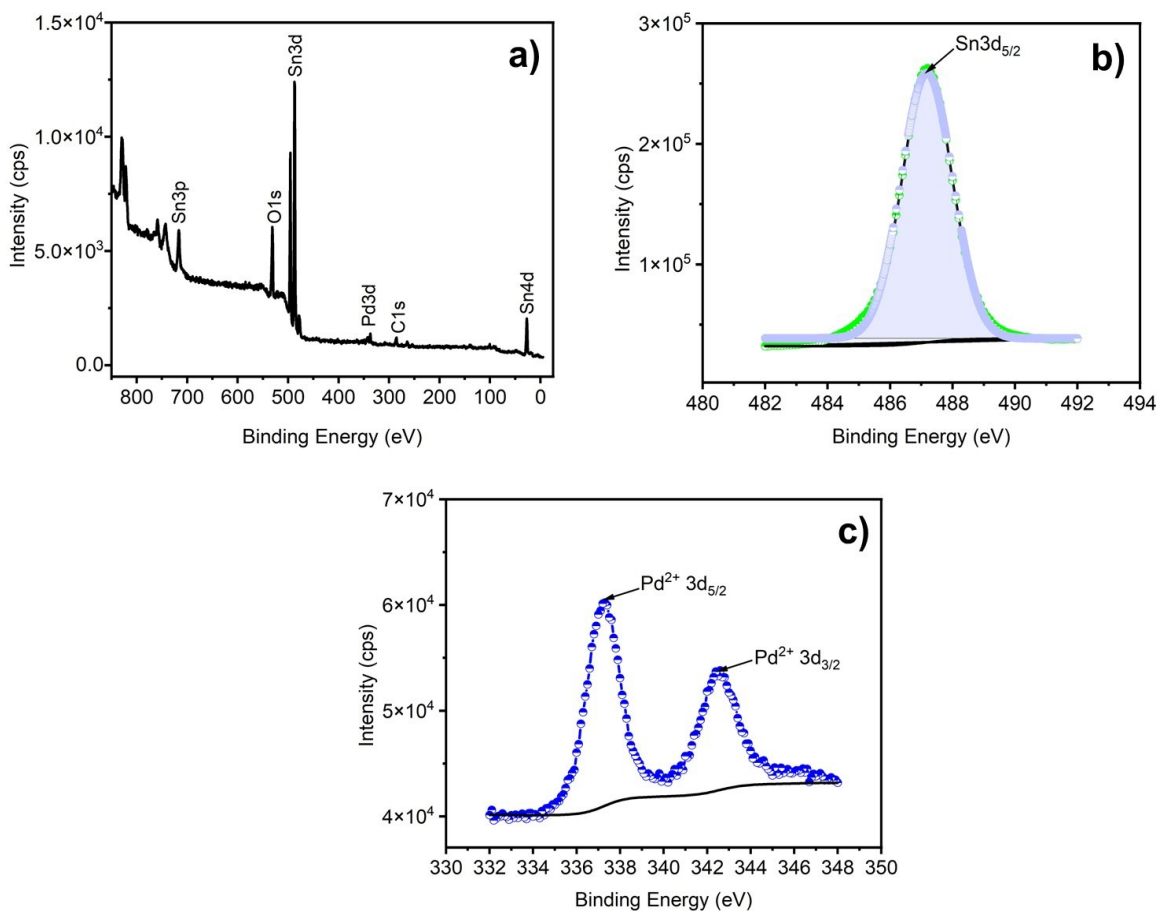

Figure S11. XPS characterization of Pd NP/SnO<sub>2</sub>: a) The full spectrum scan of XPS; b) Sn 3d<sub>5/2</sub> region of Pd NP/SnO<sub>2</sub>; c) Pd 3d region of Pd NP/SnO<sub>2</sub>.

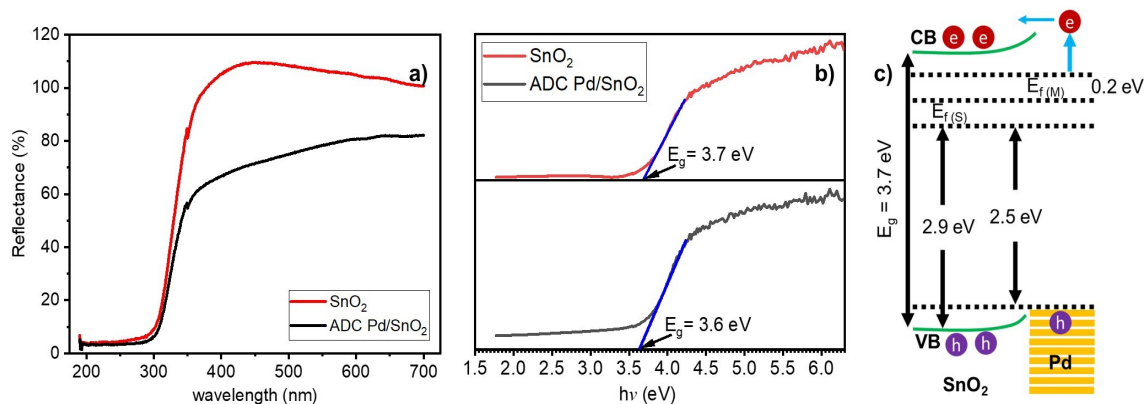

Figure S12. a) UV-vis diffuse reflectance spectra (DRS) of pure SnO<sub>2</sub> and ADC Pd/SnO<sub>2</sub>; b) Respective Kubelka Munk function for estimating the band gap energy. c) Proposed band structure diagram for SnO<sub>2</sub> and ADC Pd/SnO<sub>2</sub>.

Table S2. Types and number of scattering paths expected for different structural models. The ADC Model 3 is consistent with the EXAFS modeling of ADC Pd/SnO<sub>2</sub> sample.

|                                                                                                          | Pd-Pd interaction |    |       | Pd-Sn interaction |    |       |
|----------------------------------------------------------------------------------------------------------|-------------------|----|-------|-------------------|----|-------|
|                                                                                                          | Scattering Path   | CN | R (Å) | Scattering Path   | CN | R (Å) |
| <b>PdO Sheet</b>                                                                                         | Pd-O              | 4  | 2.01  | Pd-O              | -  | -     |
|                                                                                                          | Pd-Pd             | 2  | 3.02  | Pd-Sn             | -  | -     |
|                                                                                                          | Pd-Pd             | -  | -     | Pd-Sn             | -  | -     |
|                                                                                                          |                   |    |       |                   |    |       |
| <b>ADC Model 1</b><br>Pd <sub>2</sub> O <sub>6</sub> anchored vertically on O atoms of SnO <sub>2</sub>  | Scattering Path   | CN | R (Å) | Scattering Path   | CN | R (Å) |
|                                                                                                          | Pd-O              | 4  | 2.01  | Pd-O              | -  | -     |
|                                                                                                          | Pd-Pd             | 1  | 3.02  | Pd-Sn             | 1  | 2.21  |
|                                                                                                          | Pd-Pd             | -  | -     | Pd-Sn             | -  | -     |
| <b>ADC Model 2</b><br>Pd <sub>2</sub> O <sub>6</sub> anchored vertically on Sn atoms of SnO <sub>2</sub> | Scattering Path   | CN | R (Å) | Scattering Path   | CN | R (Å) |
|                                                                                                          | Pd-O              | 4  | 2.01  | Pd-O              | -  | -     |
|                                                                                                          | Pd-Pd             | 1  | 3.02  | Pd-Sn             | -  | -     |
|                                                                                                          | Pd-Pd             | -  | -     | Pd-Sn             | 1  | 3.90  |
| <b>ADC Model 3</b><br>Pd <sub>2</sub> O <sub>6</sub> flat on the surface of SnO <sub>2</sub>             | Scattering Path   | CN | R (Å) | Scattering Path   | CN | R (Å) |
|                                                                                                          | Pd-O              | 4  | 2.01  | Pd-O              | -  | -     |
|                                                                                                          | Pd-Pd             | 1  | 3.02  | Pd-Sn             | -  | -     |
|                                                                                                          | Pd-Pd             | -  | -     | Pd-Sn             | 1  | 3.40  |

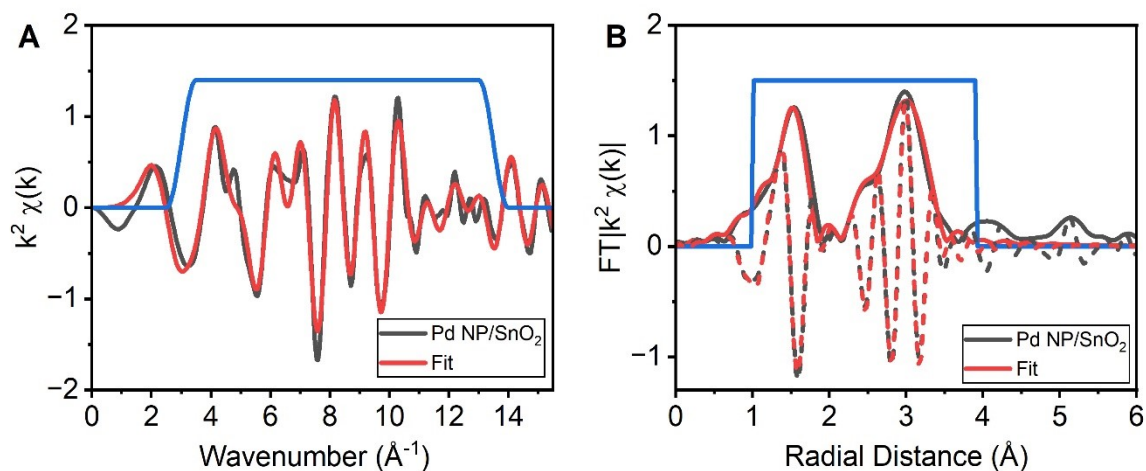

Figure S13. EXAFS modeling of the Pd NPs/SnO<sub>2</sub> using coordination numbers and bond distances of bulk PdO. The detail of the fit is summarized in Table S3. Fitting was performed on the k-range of 3.0 – 13.5 Å<sup>-1</sup> and R-range of 1.0 – 3.9 Å. S<sub>0</sub><sup>2</sup> was set to 0.78±0.04.

Table S3. Types and number of scattering paths for EXAFS modeling of Pd NP.

| Scattering path | CN | R (Å)       | $\sigma^2 \times 10^3 (\text{Å}^2)$ | $\Delta E_0$ (eV) | R factor (%) |
|-----------------|----|-------------|-------------------------------------|-------------------|--------------|
| Pd-O            | 4  | 2.01 ± 0.01 | 1.6 ± 0.7                           | -<br>5.1 ± 1.3    | 2.5          |
| Pd-Pd           | 4  | 3.04 ± 0.01 | 4.0 ± 0.6                           | -<br>5.1 ± 1.3    |              |
| Pd-Pd           | 8  | 3.43 ± 0.01 | 4.7 ± 0.5                           | -<br>5.1 ± 1.3    |              |

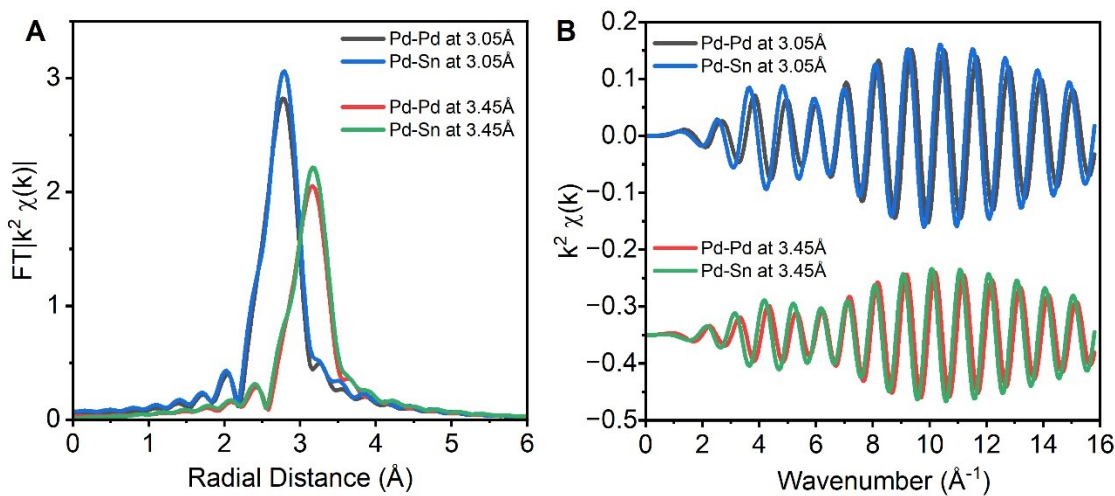

Figure S14. Comparison of Pd-Pd vs. Pd-Sn scattering paths at 3.05 and 3.45 Å in the  $k^2$ -weighted (A) magnitude  $R$ -space and (B)  $k$ -space.

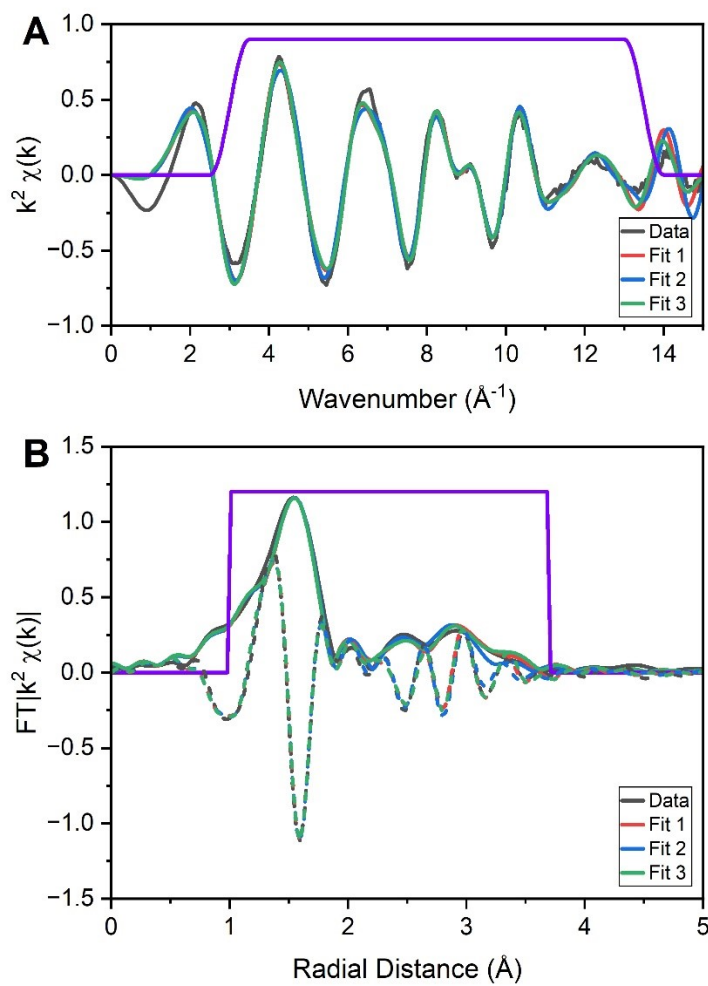

Figure S15. Comparison of the EXAFS modeling of ADC Pd/SnO<sub>2</sub> using different combinations of scattering paths. The data and fits are shown in the  $k^2$ -weighted (A)  $k$ -space and (B)  $R$ -space in magnitude (solid lines) and imaginary (dotted lines). Fit 1 includes only Pd-Pd paths while fit 2 includes only Pd-Sn paths. Fit 3 includes both Pd-Pd and Pd-Sn. All fits also include Pd-O path. The details of the fits are summarized in Table S4. Fitting was performed on the  $k$ -range of 3.0 – 13.5  $\text{\AA}^{-1}$  and  $R$ -range of 1.0 – 3.7  $\text{\AA}$ .

Table S4. Fitting parameters for the EXAFS of ADC Pd/SnO<sub>2</sub>

|                                                                                                                                                                                                                                                                                                                             | <b>Scattering path</b> | <b>CN</b>     | <b>R (Å)</b>    | $\sigma^2 \times 10^3 (\text{Å}^2)$ | $\Delta E_0$ (eV) | <b>R factor (%)</b> |
|-----------------------------------------------------------------------------------------------------------------------------------------------------------------------------------------------------------------------------------------------------------------------------------------------------------------------------|------------------------|---------------|-----------------|-------------------------------------|-------------------|---------------------|
| <b>Fit 1</b><br>Pd-Pd only                                                                                                                                                                                                                                                                                                  | Pd-O                   | $3.7 \pm 0.3$ | $2.02 \pm 0.01$ | $1.9 \pm 1.0$                       | $-2.3 \pm 1.3$    | 2.1                 |
|                                                                                                                                                                                                                                                                                                                             | Pd-Pd                  | $0.5 \pm 0.5$ | $3.05 \pm 0.02$ | $0.2 \pm 4.4$                       | $-2.3 \pm 1.3$    |                     |
|                                                                                                                                                                                                                                                                                                                             | Pd-Pd                  | $1.3 \pm 1.0$ | $3.44 \pm 0.02$ | $3.3 \pm 4.6$                       | $-2.3 \pm 1.3$    |                     |
| <b>Fit 2</b><br>Pd-Sn only                                                                                                                                                                                                                                                                                                  | Pd-O                   | $3.9 \pm 0.3$ | $2.02 \pm 0.01$ | $2.1 \pm 0.8$                       | $-3.1 \pm 1.2$    | 1.6                 |
|                                                                                                                                                                                                                                                                                                                             | Pd-Sn                  | $0.7 \pm 0.5$ | $3.02 \pm 0.01$ | $1.7 \pm 3.7$                       | $-3.1 \pm 1.2$    |                     |
|                                                                                                                                                                                                                                                                                                                             | Pd-Sn                  | $0.9 \pm 0.7$ | $3.40 \pm 0.02$ | $2.4 \pm 4.7$                       | $-3.1 \pm 1.2$    |                     |
| <b>Fit 3</b><br>Pd-Pd & Pd-Sn                                                                                                                                                                                                                                                                                               | Pd-O                   | $3.8 \pm 0.3$ | $2.02 \pm 0.01$ | $2.0 \pm 0.9$                       | $-2.4 \pm 1.3$    | 1.9                 |
|                                                                                                                                                                                                                                                                                                                             | Pd-Pd                  | $1.0 \pm 0.9$ | $3.06 \pm 0.02$ | $3.2 \pm 4.7$                       | $-2.4 \pm 1.3$    |                     |
|                                                                                                                                                                                                                                                                                                                             | Pd-Sn                  | $1.7 \pm 1.3$ | $3.44 \pm 0.03$ | $6.0 \pm 5.5$                       | $3.9 \pm 3.6$     |                     |
| <p><math>S_0^2</math> was set to <math>0.78 \pm 0.04</math> based on fitting of Pd foil.<br/>           Fitting was performed on the k-range of <math>3.0 - 13.5 \text{ Å}^{-1}</math> and R-range of <math>1.0 - 3.7 \text{ Å}</math>.<br/>           Paths were generated from PdO and Sn-substituted PdO structures.</p> |                        |               |                 |                                     |                   |                     |



**a)****PdO Sheet**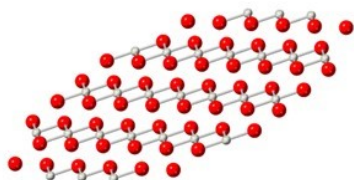**b)****Model 02**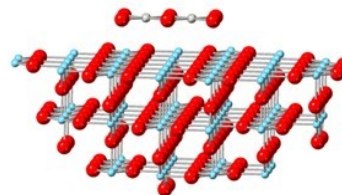**c)****Model 01**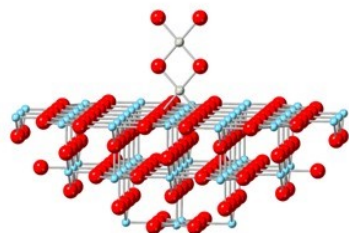**d)****Model 03**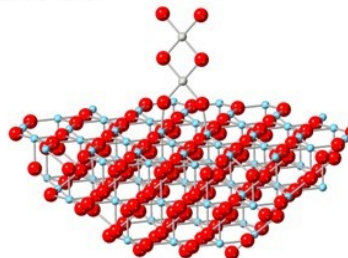

Figure S16. Structural models considered for the ADC Pd/SnO<sub>2</sub>. (a) A layer of PdO sheet. (b) Model 1 has a Pd<sub>2</sub>O<sub>6</sub> unit anchored vertically on O atoms of SnO<sub>2</sub>. (c) Model 2 has a Pd<sub>2</sub>O<sub>6</sub> unit anchored vertically on Sn atoms of SnO<sub>2</sub>. (d) Model 3 has a Pd<sub>2</sub>O<sub>6</sub> lying flat on the surface of SnO<sub>2</sub>. (Red: O, Grey: Pd, Blue: Sn)

Table S5. Types and number of scattering paths expected for different structural models. The Model 3 is consistent with the EXAFS modeling of ADC Pd/SnO<sub>2</sub> sample.

|                                                                                                      | Pd-Pd interaction |    |       | Pd-Sn interaction |    |       |
|------------------------------------------------------------------------------------------------------|-------------------|----|-------|-------------------|----|-------|
|                                                                                                      | Scattering Path   | CN | R (Å) | Scattering Path   | CN | R (Å) |
| <b>PdO Sheet</b>                                                                                     | Pd-O              | 4  | 2.01  | Pd-O              | -  | -     |
|                                                                                                      | Pd-Pd             | 2  | 3.02  | Pd-Sn             | -  | -     |
|                                                                                                      | Pd-Pd             | -  | -     | Pd-Sn             | -  | -     |
|                                                                                                      |                   |    |       |                   |    |       |
| <b>Model 1</b><br>Pd <sub>2</sub> O <sub>6</sub> anchored vertically on O atoms of SnO <sub>2</sub>  | Scattering Path   | CN | R (Å) | Scattering Path   | CN | R (Å) |
|                                                                                                      | Pd-O              | 4  | 2.01  | Pd-O              | -  | -     |
|                                                                                                      | Pd-Pd             | 1  | 3.02  | Pd-Sn             | 1  | 2.21  |
|                                                                                                      | Pd-Pd             | -  | -     | Pd-Sn             | -  | -     |
| <b>Model 2</b><br>Pd <sub>2</sub> O <sub>6</sub> anchored vertically on Sn atoms of SnO <sub>2</sub> | Scattering Path   | CN | R (Å) | Scattering Path   | CN | R (Å) |
|                                                                                                      | Pd-O              | 4  | 2.01  | Pd-O              | -  | -     |
|                                                                                                      | Pd-Pd             | 1  | 3.02  | Pd-Sn             | -  | -     |
|                                                                                                      | Pd-Pd             | -  | -     | Pd-Sn             | 1  | 3.90  |
| <b>Model 3</b><br>Pd <sub>2</sub> O <sub>6</sub> flat on the surface of SnO <sub>2</sub>             | Scattering Path   | CN | R (Å) | Scattering Path   | CN | R (Å) |
|                                                                                                      | Pd-O              | 4  | 2.01  | Pd-O              | -  | -     |
|                                                                                                      | Pd-Pd             | 1  | 3.02  | Pd-Sn             | -  | -     |
|                                                                                                      | Pd-Pd             | -  | -     | Pd-Sn             | 1  | 3.40  |

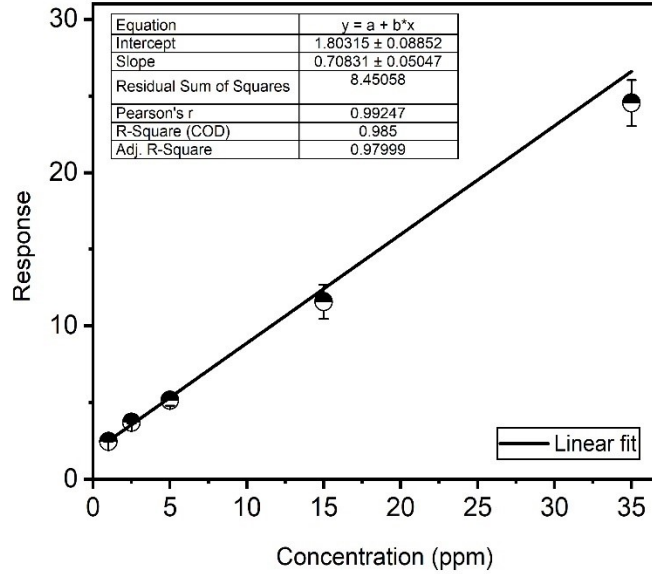

Figure S17. Estimation of limit of detection of the ADC Pd/SnO<sub>2</sub> sensor. Linear fit to the sensor response to CO at varying concentrations between 1-35 ppm at 60 °C.

The LOD of the sensor was calculated by,

$$LOD = \frac{3 \times RMS_{noise}}{slope} \quad (S3)$$

where  $RMS_{noise}$  is the root-mean-square error.

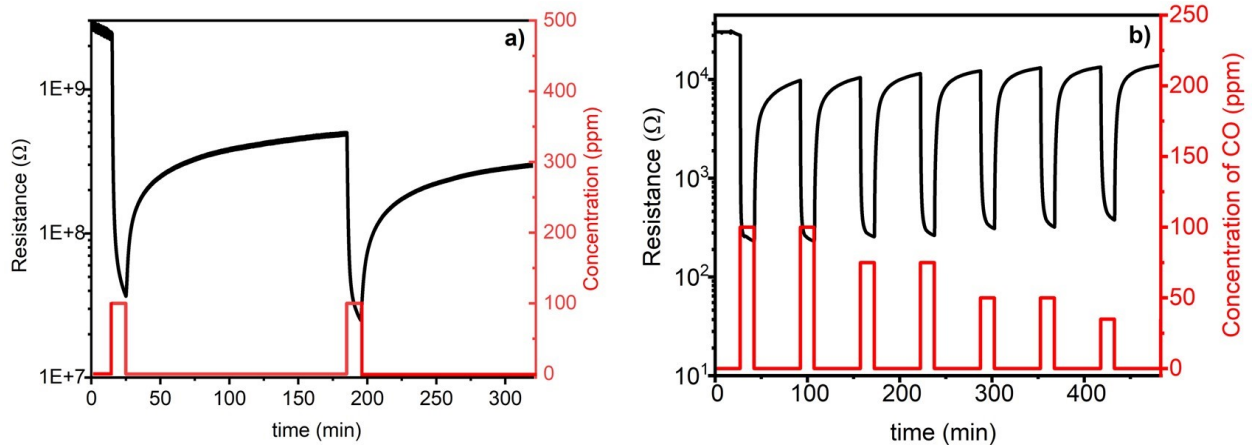

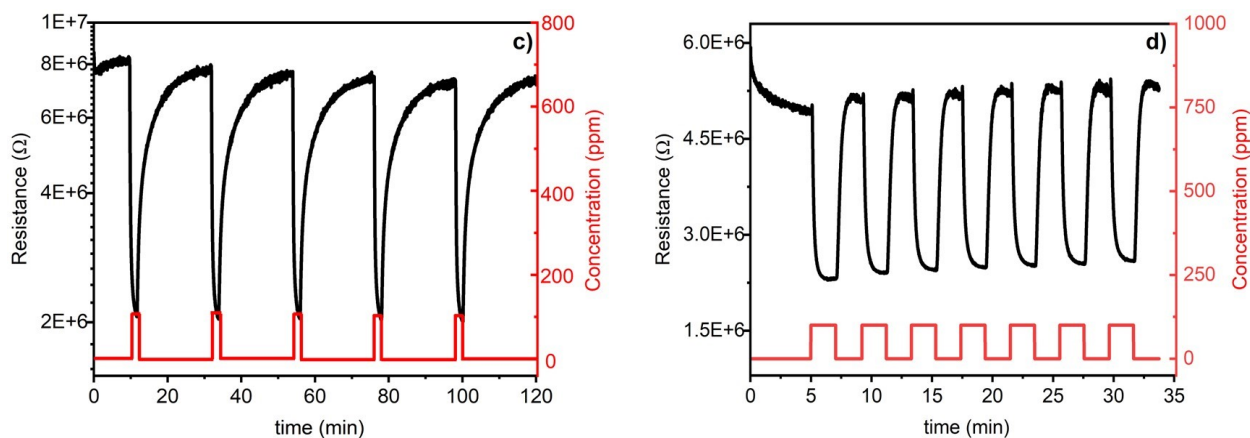

Figure S18. Dynamic response and recovery curves of the ADC Pd/SnO<sub>2</sub> sensor upon exposure to 100 ppm CO at various temperatures between 25-120 °C: a-d) Sensor resistance plots of ADC Pd/SnO<sub>2</sub> to 100 ppm pulses of CO at 25-120 °C.

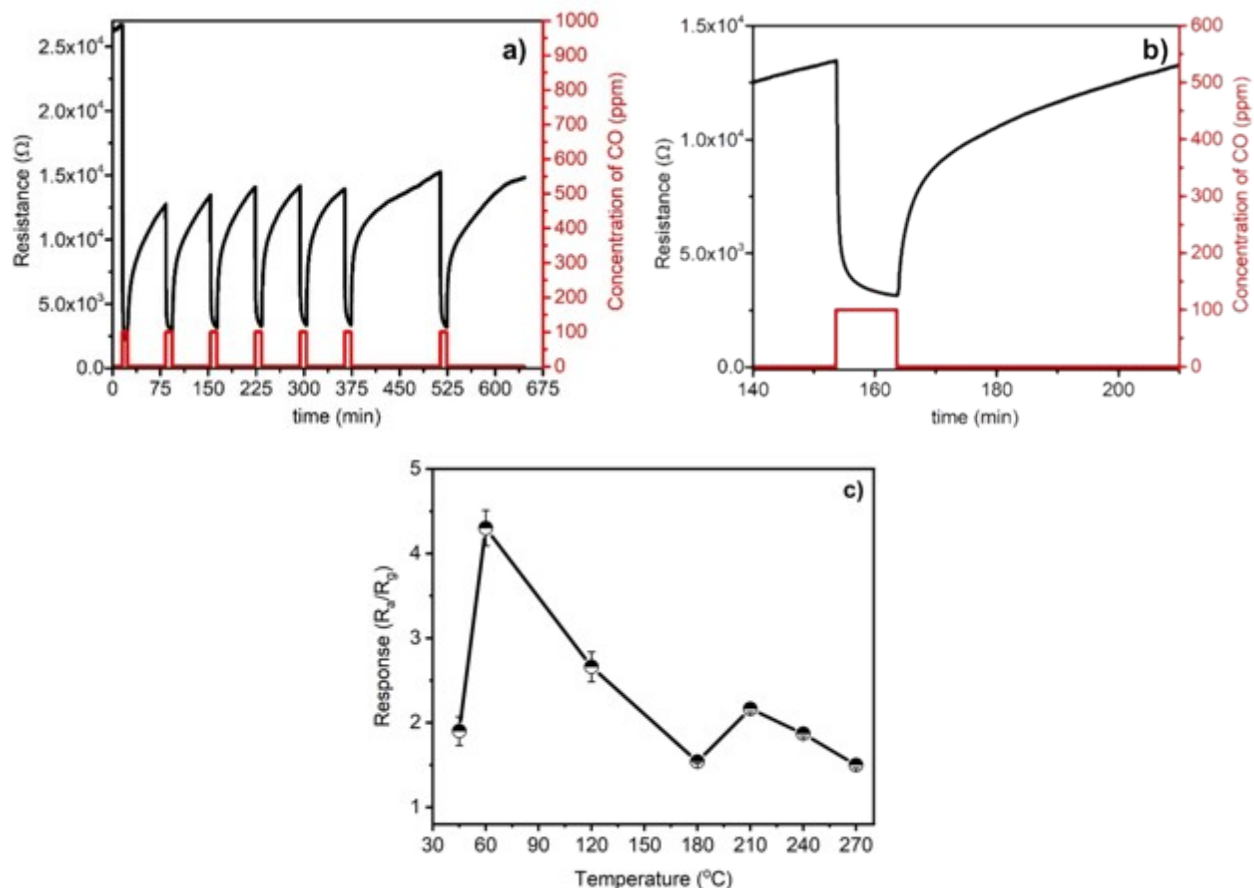

Figure S19. a) Sensor resistance plot of Pd NP/SnO<sub>2</sub> to 100 ppm pulses of CO at 60 °C. b) Extended sensor resistance plot of Pd NP/SnO<sub>2</sub> to 100 ppm pulses of CO at 60 °C during ~154-164 min. c) Sensor response to 100 ppm CO at 45-270 °C.

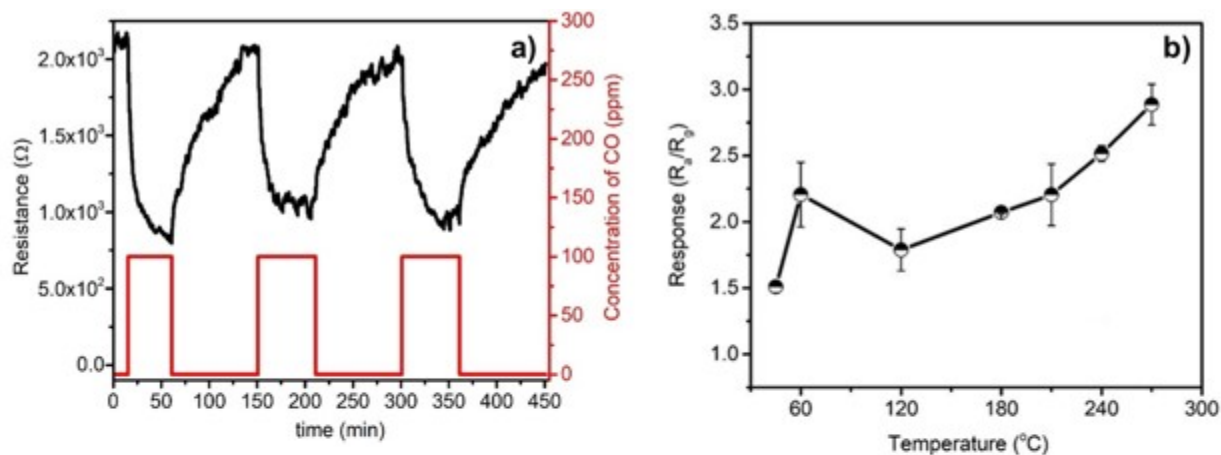

Figure S20. a) Sensor resistance plot of pure SnO<sub>2</sub> to 100 ppm pulses of CO at 60 °C. b) Sensor response to 100 ppm CO at 45-270 °C.

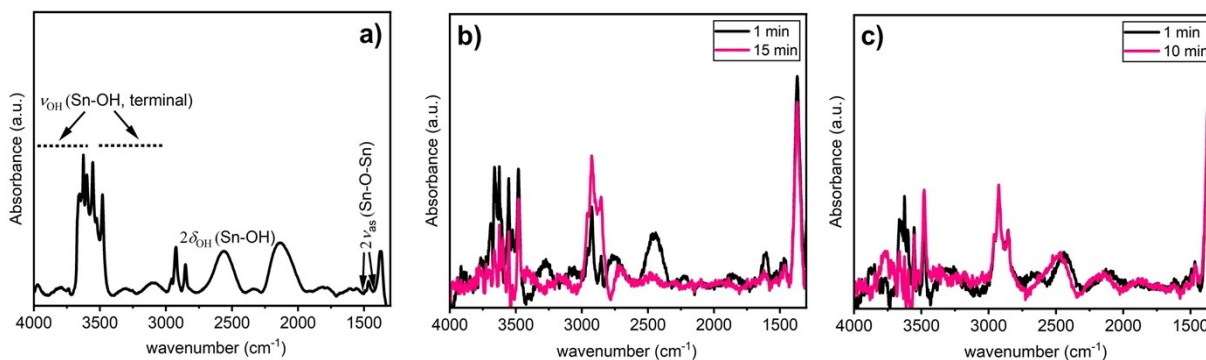

Figure S21. In situ IR spectroscopy of CO interaction with pure SnO<sub>2</sub> in air at 60 °C: a) Prior to CO exposure (4000-1300 cm<sup>-1</sup> region); b) During dosing of 1000 ppm CO collected at 1 min and 15 min (4000-1300 cm<sup>-1</sup> region); c) After CO removal acquired at 1 min and 10 min (4000-1300 cm<sup>-1</sup> region).

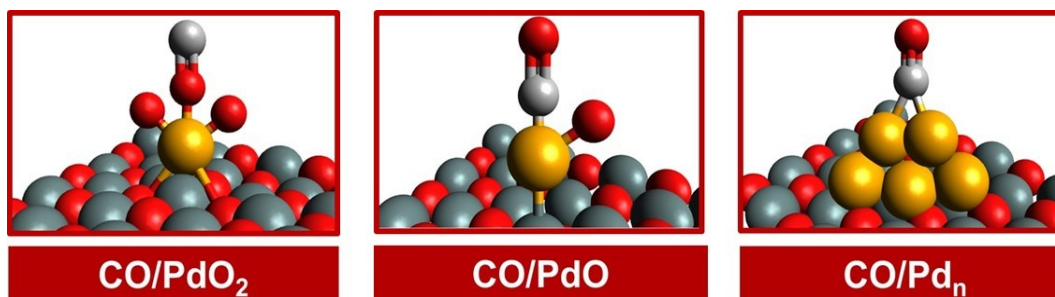

Figure S22. Illustration of the different CO adsorption sites on ADC Pd/SnO<sub>2</sub>. Pd, Sn, C, and O atoms are displayed as orange, dark gray, light gray and red spheres, respectively.: CO linearly adsorbed on isolated, positively charged single Pd atoms, CO linearly adsorbed on atop geometry

on Pd single atoms bound to SnO<sub>2</sub> support *via* one oxygen atom, and bridging CO adsorbed on the metallic Pd cluster, respectively.

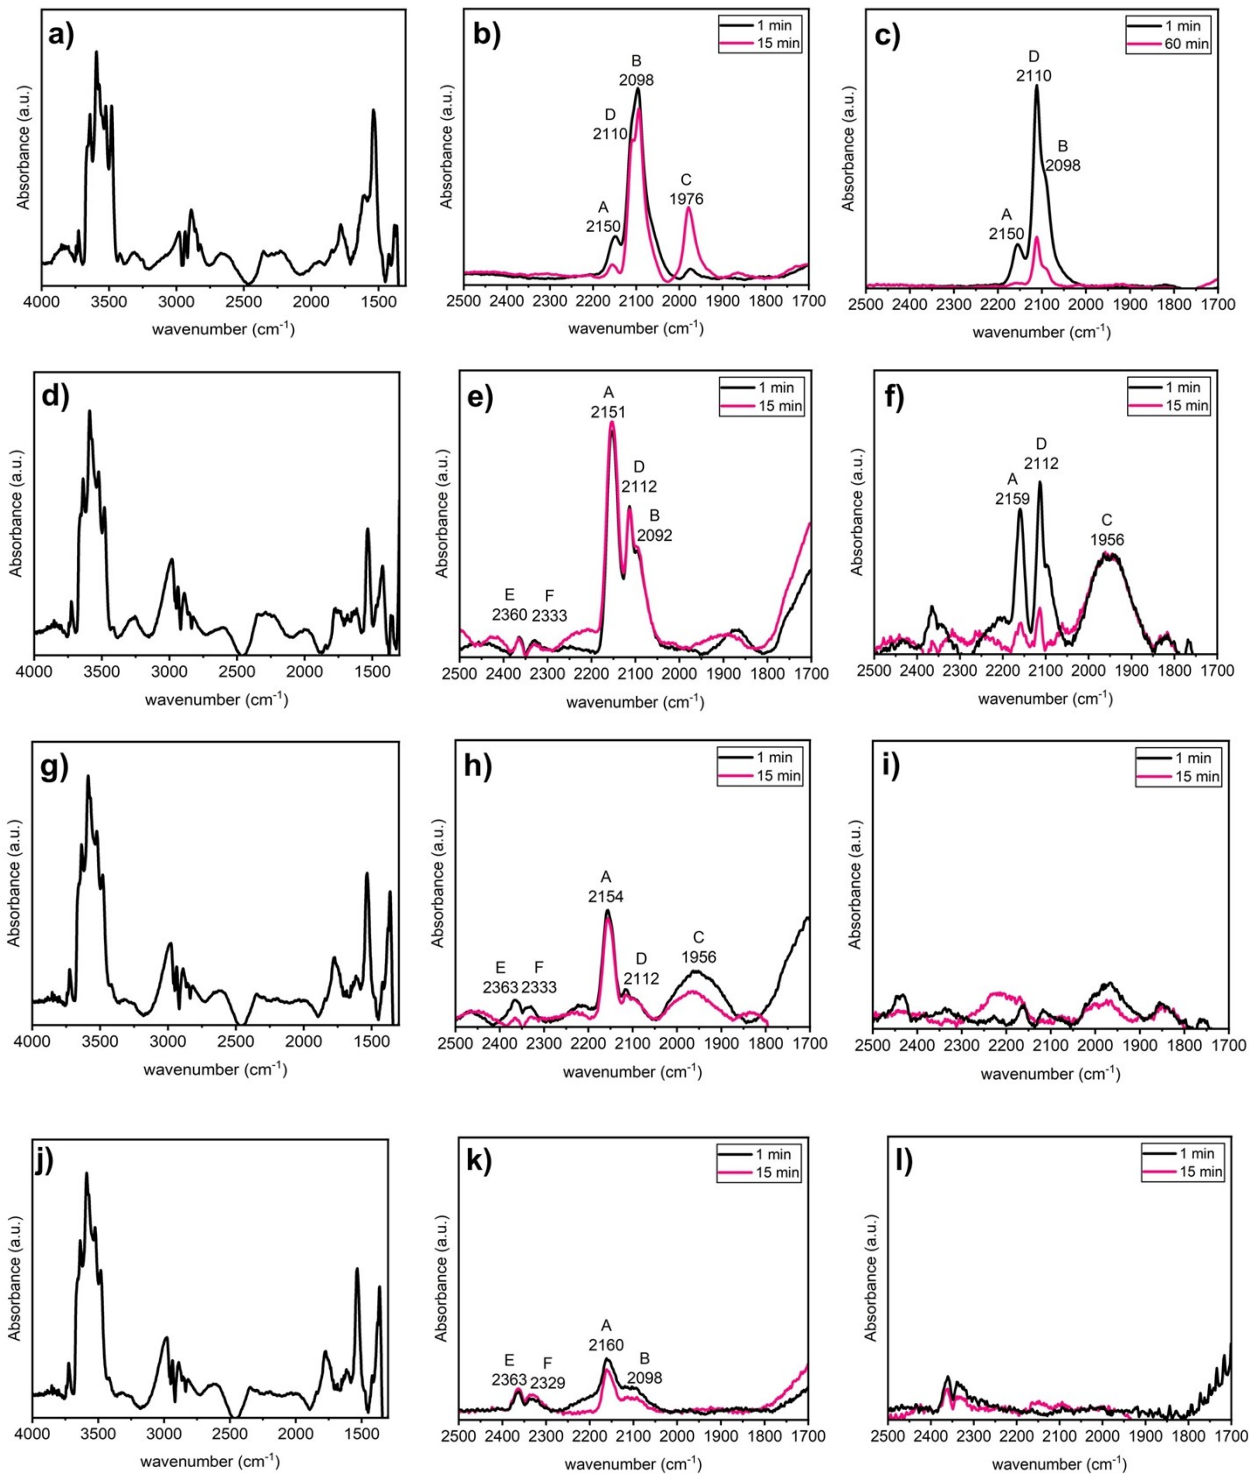

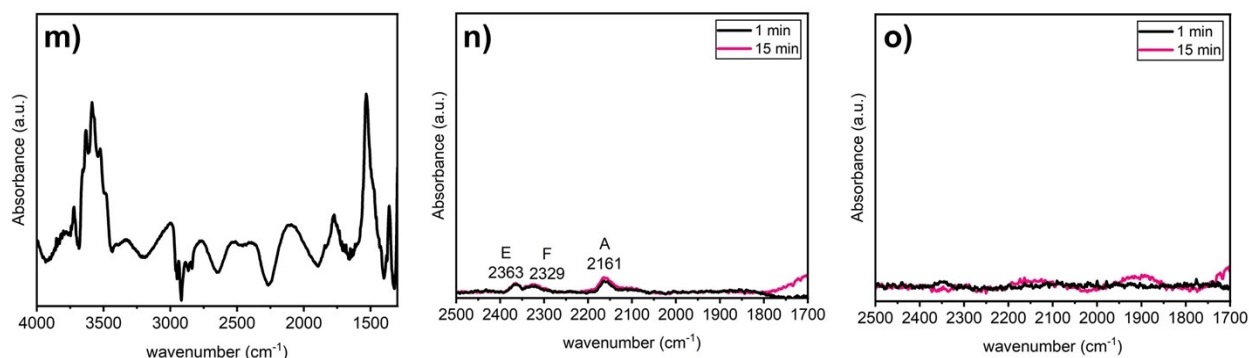

Figure S23. In situ IR spectroscopy of CO interaction with ADC Pd/SnO<sub>2</sub> in air at 120-270 °C a) In situ IR spectra (4000-1300 cm<sup>-1</sup>) in air at 120 °C and at ambient pressure after calcination at 270 °C b) In situ FTIR spectra (2500–1700 cm<sup>-1</sup>) during dosing of 1000 ppm CO in air at 120 °C and at ambient pressure collected at various times c) In situ FTIR spectra (2500–1700cm<sup>-1</sup>) after CO exposure at 120 °C acquired at various times. d) In situ IR spectra (4000-1300 cm<sup>-1</sup>) in air at 180 °C and at ambient pressure after calcination at 270 °C e) In situ FTIR spectra (2500–1700 cm<sup>-1</sup>) during dosing of 1000 ppm CO in air at 180 °C and at ambient pressure collected at various times f) In situ FTIR spectra (2500–1700 cm<sup>-1</sup>) after CO exposure at 180 °C acquired at various times. CO oxidation on ADC Pd/SnO<sub>2</sub> g) In situ IR spectra (4000-1300 cm<sup>-1</sup>) in air at 210 °C and at ambient pressure after calcination at 270 °C h) In situ FTIR spectra (2500–1700 cm<sup>-1</sup>) during dosing of 1000 ppm CO in air at 210 °C and at ambient pressure collected at various times i) In situ FTIR spectra (2500–1700 cm<sup>-1</sup>) after CO exposure at 210 °C acquired at various times. j) In situ IR spectra (4000-1300 cm<sup>-1</sup>) in air at 240 °C and at ambient pressure after calcination at 270 °C k) In situ FTIR spectra (2500–1700 cm<sup>-1</sup>) during dosing of 1000 ppm CO in air at 240 °C and at ambient pressure collected at various times l) In situ FTIR spectra (2500–1700 cm<sup>-1</sup>) after CO exposure at 240 °C acquired at various times. m) In situ IR spectra (4000-1300 cm<sup>-1</sup>) in air at 270 °C and at ambient pressure after calcination at 270 °C n) In situ FTIR spectra (2500–1700 cm<sup>-1</sup>) during dosing of 1000 ppm CO in air at 270 °C and at ambient pressure collected at various times o) In situ FTIR spectra (2500–1700 cm<sup>-1</sup>) after CO exposure at 270 °C acquired at various times.

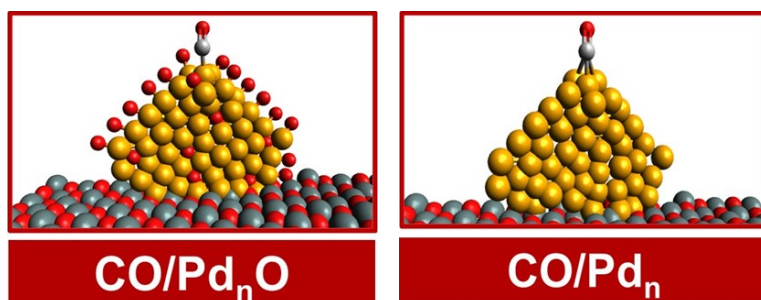

Figure S24. Illustration of the different CO adsorption sites on Pd NP/SnO<sub>2</sub>. Pd, Sn, C, and O atoms are displayed as orange, dark gray, light gray and red spheres, respectively.: CO linearly adsorbed on atop PdO nanoclusters and bridging CO adsorbed on metallic Pd NPs, respectively.

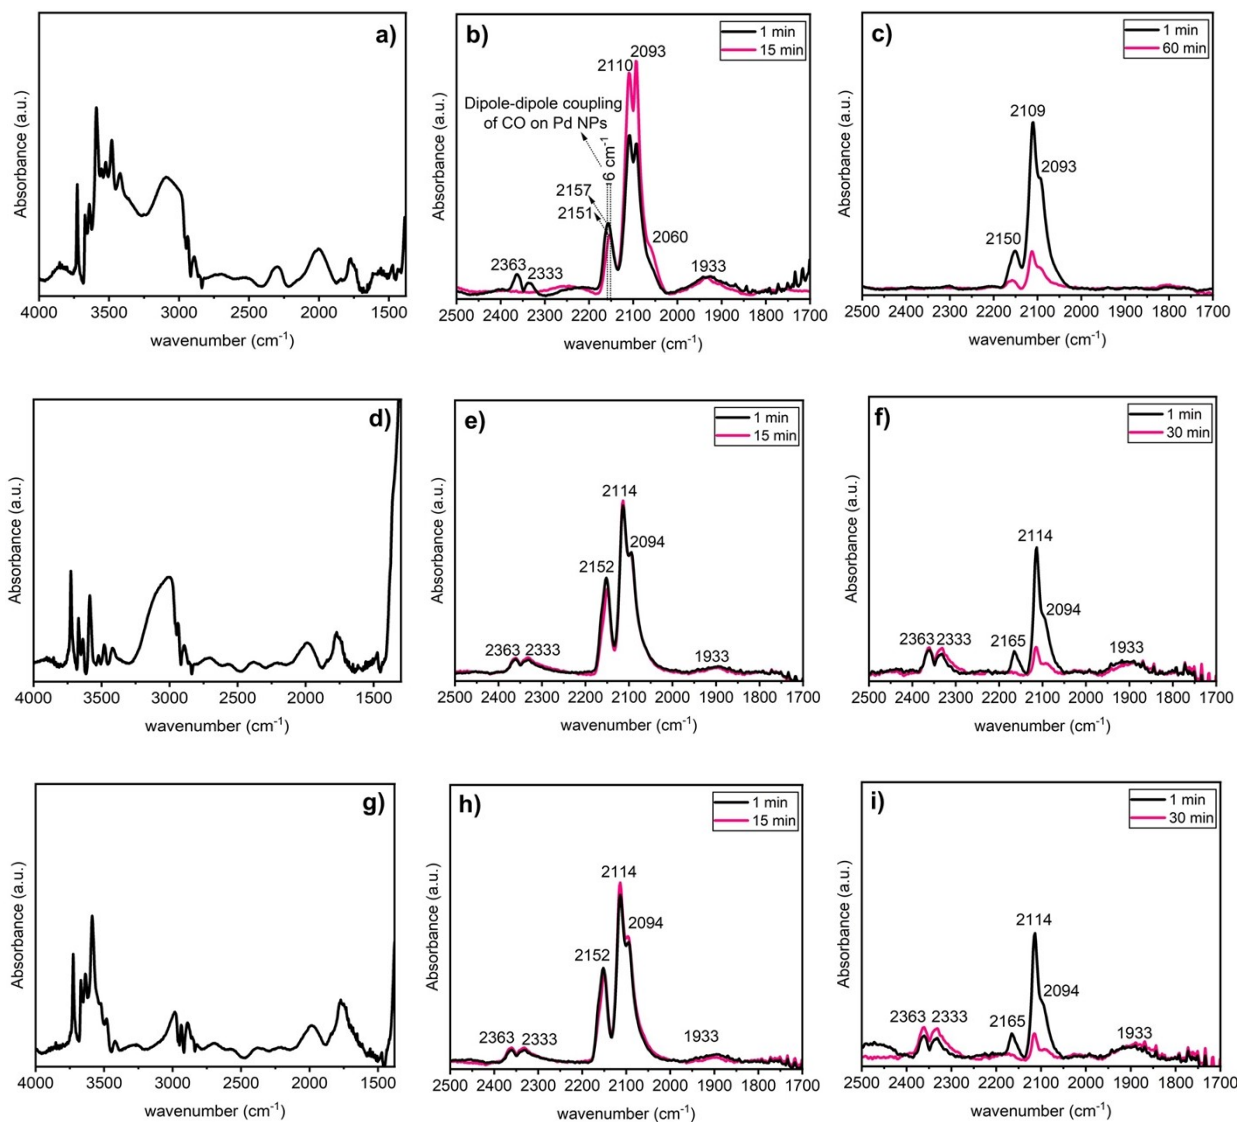



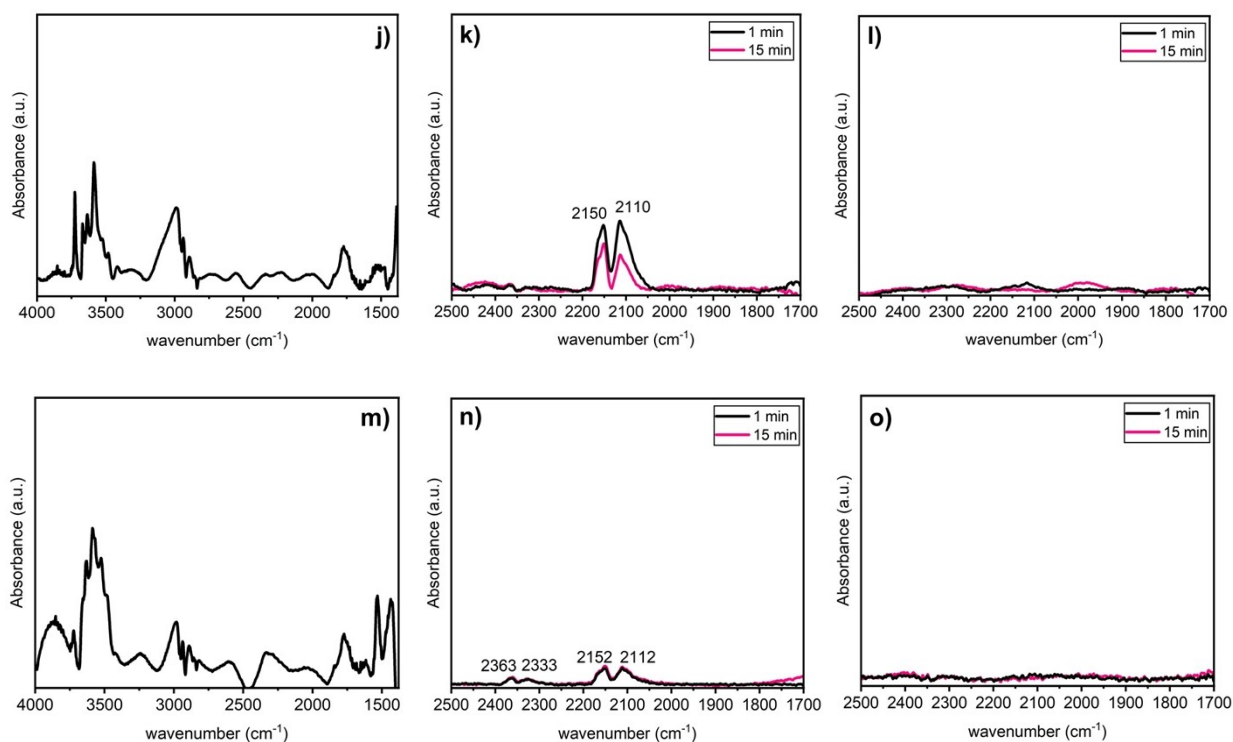

Figure S25. In situ IR spectroscopy of CO interaction with Pd NP/SnO<sub>2</sub> in air at 120-270 °C a) In situ IR spectra (4000-1300 cm<sup>-1</sup>) in air at 120 °C and at ambient pressure after calcination at 270 °C b) In situ FTIR spectra (2400–1750 cm<sup>-1</sup>) during dosing of 1000 ppm CO in air at 120 °C and at ambient pressure collected at various times c) In situ FTIR spectra (2350–1850 cm<sup>-1</sup>) after CO exposure at 120 °C acquired at various times. d) In situ IR spectra (4000-1300 cm<sup>-1</sup>) in air at 180 °C and at ambient pressure after calcination at 270 °C e) In situ FTIR spectra (2500–1800 cm<sup>-1</sup>) during dosing of 1000 ppm CO in air at 180 °C and at ambient pressure collected at various times f) In situ FTIR spectra (2450–1800 cm<sup>-1</sup>) after CO exposure at 180 °C acquired at various times. CO oxidation on ADC Pd/SnO<sub>2</sub> g) In situ IR spectra (4000-1300 cm<sup>-1</sup>) in air at 210 °C and at ambient pressure after calcination at 270 °C h) In situ FTIR spectra (2500–1800 cm<sup>-1</sup>) during dosing of 1000 ppm CO in air at 210 °C and at ambient pressure collected at various times i) In situ FTIR spectra (2500–1800 cm<sup>-1</sup>) after CO exposure at 210 °C acquired at various times. j) In situ IR spectra (4000-1300 cm<sup>-1</sup>) in air at 240 °C and at ambient pressure after calcination at 270 °C k) In situ FTIR spectra (2500–1800 cm<sup>-1</sup>) during dosing of 1000 ppm CO in air at 240 °C and at ambient pressure collected at various times l) In situ FTIR spectra (2550–1900 cm<sup>-1</sup>) after CO exposure at 240 °C acquired at various times. m) In situ IR spectra (4000-1300 cm<sup>-1</sup>) in air at 270 °C and at ambient pressure after calcination at 270 °C n) In situ FTIR spectra (2500–1800 cm<sup>-1</sup>)

during dosing of 1000 ppm CO in air at 270 °C and at ambient pressure collected at various times  
o) In situ FTIR spectra (2550–1750  $\text{cm}^{-1}$ ) after CO exposure at 270 °C acquired at various times.

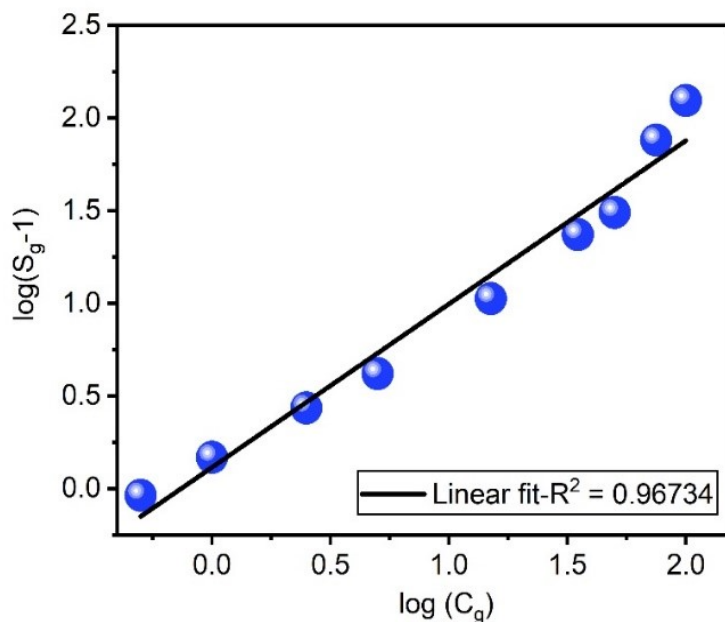

Figure S26. Log ( $S_g-1$ ) vs. log  $C_g$  curve of ADC Pd/SnO<sub>2</sub> sensor response to CO at 60 °C, where  $S_g$  is the sensor response (defined previously as  $R_a/R_g$ ), expressed by Equation 1 in the main text and  $C_g$  is the gas concentration.
